# Supplementary material for: Mutations in TP53 increase the risk of SOX2 copy number alterations and silencing of TP53 reduces SOX2 expression in non-small cell lung cancer
Source: Springer Nature journal article supplement (doi:10.1186/s12885-016-2061-3), 2016-01-19
Supplement: MOESM1 [file 9745906]

Suppl. table 1. Association between clinicopathological data and gene status in tumor tissues.

|                                      | <i>SOX2 gene status</i> |             | <i>p-value</i> <sup>†</sup> |
|--------------------------------------|-------------------------|-------------|-----------------------------|
|                                      | <i>normal</i>           | <i>CNV*</i> |                             |
| <b><i>Age</i></b>                    |                         |             |                             |
| <55                                  | 26                      | 16          | ns                          |
| ≥55                                  | 122                     | 82          |                             |
| <b><i>Gender</i></b>                 |                         |             |                             |
| Female                               | 47                      | 24          | ns                          |
| Male                                 | 101                     | 74          |                             |
| <b><i>Smoking</i></b>                |                         |             |                             |
| Non-smokers                          | 15                      | 2           | p=0.015                     |
| Smokers                              | 126                     | 90          |                             |
| <b><i>Pack-years</i><sup>‡</sup></b> |                         |             |                             |
| ≤20                                  | 40                      | 31          | ns                          |
| >20, ≤40                             | 52                      | 33          |                             |
| >40                                  | 36                      | 24          |                             |

\*Samples were defined to have a copy number variation (CNV) if the copy number was above 2.5 or below 1.5. <sup>†</sup>p-values for categorical variables were obtained from Chi-square or Fisher's exact test and for ordinal variables from nonparametric Mann-Whitney test or Kruskal Wallis ANOVA. <sup>‡</sup>Pack-years indicates the number of cigarettes smoked per day x number of years smoked/20.
